# Supplementary material for: Universal barcoding regions, rbcL, matK and trnH-psbA do not discriminate Cinnamomum species in Sri Lanka
Source: PubMed Central journal article supplement (PMC7875411; doi:10.1371/journal.pone.0245592), 2021-02-10
Supplement: pone.0245592.s001.pdf [file pone.0245592.s001.pdf]

| Species                      | District | Location              | Voucher. No               | Qualitative leaf characters                                                           |                                                                                       |                           | Qualitative characters   |                          |                           |  |
|------------------------------|----------|-----------------------|---------------------------|---------------------------------------------------------------------------------------|---------------------------------------------------------------------------------------|---------------------------|--------------------------|--------------------------|---------------------------|--|
|                              |          |                       |                           | Leaf shape, apex and base                                                             | Venation                                                                              | LL                        | L<br>W                   | PL                       | W                         |  |
| <i>C. capparucoronde</i> 001 | Matara   | E-6.0263<br>N-80.5616 | KGG.BS-2018-<br>8-CC-M-1  |    |    | 14.3<br>±1.3 <sup>a</sup> | 5.7±<br>0.9 <sup>a</sup> | 1.7±<br>0.2 <sup>a</sup> | 10.6<br>±1.6 <sup>a</sup> |  |
| <i>C. capparucoronde</i> 002 | Matara   | E-6.0249<br>N-80.5616 | KGG.BS-2018-<br>8-CC-M-2  |    |    | 15.8<br>±1.9 <sup>a</sup> | 6.3±<br>0.8 <sup>a</sup> | 1.9±<br>0.2 <sup>a</sup> | 11.5<br>±1.9 <sup>a</sup> |  |
| <i>C. capparucoronde</i> 003 | Kandy    | E-7.1346<br>N-80.5851 | RAAK.BS-<br>2018-9-CC-D-1 |    |    | 15.5<br>±1.8 <sup>a</sup> | 6.0±<br>0.7 <sup>a</sup> | 1.8±<br>0.2 <sup>a</sup> | 10.2<br>±1.6 <sup>a</sup> |  |
| <i>C. citriodorum</i> 001    | Matara   | E-6.0225<br>N-80.5623 | KGG.BS-2018-<br>8-C-M-1   |    |    | 10.5<br>±0.8 <sup>a</sup> | 3.7±<br>0.3 <sup>a</sup> | 1.7±<br>0.2 <sup>a</sup> | 4.8±<br>1.5 <sup>a</sup>  |  |
| <i>C. citriodorum</i> 002    | N'eliya  | E-6.7548<br>N-80.7204 | BS-2019-5-C-N-<br>1       |   |   | 9.1±<br>1.9 <sup>a</sup>  | 3.6±<br>0.6 <sup>a</sup> | 1.3±<br>0.2 <sup>b</sup> | 4.6±<br>1.3 <sup>a</sup>  |  |
| <i>C. citriodorum</i> 003    | N'eliya  | E-6.5431<br>N-80.4344 | BS-2019-5-C-N-<br>2       |  |  | 8.9±<br>1.5 <sup>a</sup>  | 3.4±<br>0.5 <sup>a</sup> | 1.4±<br>0.2 <sup>b</sup> | 4.3±<br>0.7 <sup>a</sup>  |  |

|                               |                |                       |                             |                                                                                       |                               |                          |                          |                           |
|-------------------------------|----------------|-----------------------|-----------------------------|---------------------------------------------------------------------------------------|-------------------------------|--------------------------|--------------------------|---------------------------|
| <i>C. dubium</i> 001          | Rathnapur<br>a | E-6.4108<br>N-80.5088 | RHG.BS-2018-<br>11-D-S-1    | 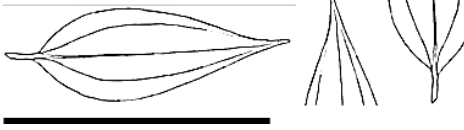   | 14.5<br>±0.5 <sup>a</sup>     | 4.1±<br>0.3 <sup>a</sup> | 1.6±<br>0.1 <sup>a</sup> | 6.9±<br>1.3 <sup>a</sup>  |
| <i>C. dubium</i> 002          | Matara         | E-6.0285<br>N-80.5610 | KGG.BS-2018-<br>8-D-M-1     |    | 12.4<br>±<br>1.2 <sup>b</sup> | 3.4±<br>0.5 <sup>a</sup> | 1.2±<br>0.2 <sup>b</sup> | 6.8±<br>0.4 <sup>a</sup>  |
| <i>C. dubium</i> 003          | Rathnapur<br>a | E-6.4267<br>N-80.4146 | RHG.BS-2018-<br>11-D-S-2    |    | 14.5<br>±1.9 <sup>a</sup>     | 3.9±<br>0.2 <sup>a</sup> | 1.6±<br>0.1 <sup>a</sup> | 7.2±<br>1.2 <sup>a</sup>  |
| <i>C. litseifolium</i><br>001 | N'eliya        | E-6.9683<br>N-80.7700 | DSA.PCG.BS-<br>2018-5-L-H-1 |    | 8.1±<br>0.5 <sup>a</sup>      | 3.8±<br>0.3 <sup>a</sup> | 1.3±<br>0.1 <sup>a</sup> | 5.42<br>±1.0 <sup>a</sup> |
| <i>C. litseifolium</i><br>002 | Matara         | E-6.0297<br>N-80.5600 | KGG.BS-2018-<br>8-L-M-1     |   | 8.7±<br>0.3 <sup>a</sup>      | 3.8±<br>0.3 <sup>a</sup> | 1.3±<br>0.2 <sup>a</sup> | 5.8±<br>1.8 <sup>a</sup>  |
| <i>C. litseifolium</i><br>003 | Kandy          | E-7.1325<br>N-80.5879 | RAAK.BS-<br>2018-9-L-D-1    |  | 9.1±<br>0.7 <sup>a</sup>      | 3.9±<br>0.4 <sup>a</sup> | 1.3±<br>0.2 <sup>a</sup> | 5.5±<br>1.9 <sup>a</sup>  |

|                           |         |                       |                              |                                                                                       |                           |                          |                          |                          |
|---------------------------|---------|-----------------------|------------------------------|---------------------------------------------------------------------------------------|---------------------------|--------------------------|--------------------------|--------------------------|
| <i>C. ovalifolium</i> 001 | N'eliya | E-6.9696<br>N-80.7700 | DSA.PCG.BS-<br>2018-5-O-H-1  |    | 5.1±<br>0.9 <sup>a</sup>  | 3.3±<br>0.2 <sup>a</sup> | 1.0±<br>0.2 <sup>a</sup> | 3.4±<br>0.9 <sup>a</sup> |
| <i>C. ovalifolium</i> 002 | N'eliya | E-6.8035<br>N-80.8031 | DSA.PCG.BS-<br>2018-5-O-HP-1 |    | 5.6±<br>0.6 <sup>a</sup>  | 3.4±<br>0.2 <sup>a</sup> | 0.9±<br>0.1 <sup>a</sup> | 3.5±<br>0.7 <sup>a</sup> |
| <i>C. ovalifolium</i> 003 | N'eliya | E-6.8035<br>N-80.8031 | DSA.PCG.BS-<br>2018-5-O-HP-2 |    | 5.7±<br>0.3 <sup>a</sup>  | 3.4±<br>0.3 <sup>a</sup> | 1.±0.<br>1 <sup>a</sup>  | 3.6±<br>0.6 <sup>a</sup> |
| <i>C. rivulorum</i> 001   | Matara  | E-6.0222<br>N-80.5624 | KGG.BS-2018-<br>8-R-M-1      |    | 11.5<br>±1.3 <sup>a</sup> | 4.3±<br>0.5 <sup>a</sup> | 1.5±<br>0.1 <sup>a</sup> | 5.2±<br>1.5 <sup>a</sup> |
| <i>C. rivulorum</i> 002   | Matara  | E-6.0222<br>N-80.5624 | KGG.BS-2018-<br>8-R-M-2      |   | 11.2<br>±0.7 <sup>a</sup> | 4.3±<br>0.5 <sup>a</sup> | 1.4±<br>0.2 <sup>a</sup> | 5.1±<br>1.2 <sup>a</sup> |
| <i>C. rivulorum</i> 003   | Matara  | E-6.0222<br>N-80.5624 | KGG.BS-2018-<br>8-R-M-3      |  | 11.6<br>±0.8 <sup>a</sup> | 4.3±<br>0.4 <sup>a</sup> | 1.5±<br>0.1 <sup>a</sup> | 4.5±<br>1.2 <sup>a</sup> |

|                                |                |                       |                                   |                                                                                       |                           |                           |                          |                           |
|--------------------------------|----------------|-----------------------|-----------------------------------|---------------------------------------------------------------------------------------|---------------------------|---------------------------|--------------------------|---------------------------|
| <i>C. sinharajaense</i><br>001 | Rathnapur<br>a | E-6.4352<br>N-80.4197 | RHG.BS-2018-<br>11-S-S-1          | 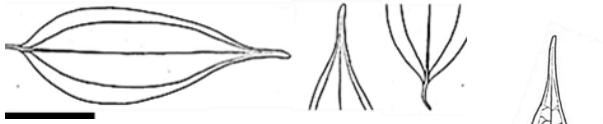   | 37.6<br>±3.5 <sup>a</sup> | 12.7<br>±2.5 <sub>a</sub> | 3.4±<br>0.5 <sup>a</sup> | 36.4<br>±4.2 <sup>a</sup> |
| <i>C. sinharajaense</i><br>002 | Matara         | E-6.0239<br>N-80.5619 | KGG.BS-2018-<br>8-S-M-1           |    | 18.6<br>±1.8 <sup>b</sup> | 8.5±<br>1.3 <sup>b</sup>  | 2.2±<br>0.2 <sup>b</sup> | 18.8<br>±1.7 <sup>b</sup> |
| <i>C. sinharajaense</i><br>003 | Matara         | E-6.0231<br>N-80.5619 | KGG.BS-2018-<br>8-S-M-4           |    | 18.4<br>±1.2 <sup>b</sup> | 8.2±<br>1.1 <sup>b</sup>  | 2.2±<br>0.3 <sup>b</sup> | 18.7<br>±1.7 <sup>b</sup> |
| <i>C. verum</i> 001            | Kandy          | E-7.1991<br>N-80.5274 | NL.BS.<br>CHWMRB-<br>2018-6-V-N-1 |    | 11.3<br>±1.1 <sup>a</sup> | 5.1±<br>0.6 <sup>a</sup>  | 1.5±<br>0.2 <sup>a</sup> | 10.9<br>±1.2 <sup>a</sup> |
| <i>C. verum</i> 002            | Matara         | E-6.0241<br>N-80.5654 | KGG.BS-2018-<br>8-V-M-1           |   | 11.7<br>±1.0 <sup>a</sup> | 5.2±<br>0.5 <sup>a</sup>  | 1.5±<br>0.2 <sup>a</sup> | 10.8<br>±1.5 <sup>a</sup> |
| <i>C. verum</i> 003            | Matara         | E-6.0231<br>N-80.5624 | KGG.BS-2018-<br>8-V-M-2           |  | 11.0<br>±0.7 <sup>a</sup> | 5.1±<br>0.3 <sup>a</sup>  | 1.5±<br>0.2 <sup>a</sup> | 10.8<br>±1.4 <sup>a</sup> |
