# Supplementary material for: Universal barcoding regions, rbcL, matK and trnH-psbA do not discriminate Cinnamomum species in Sri Lanka
Source: PubMed Central journal article supplement (PMC7875411; doi:10.1371/journal.pone.0245592), 2021-02-10
Supplement: pone.0245592.s002.pdf [file pone.0245592.s002.pdf]

| Species/Specimen voucher                                                             | Accession no                                                                                                 |                                                           |                                                                                                                                |
|--------------------------------------------------------------------------------------|--------------------------------------------------------------------------------------------------------------|-----------------------------------------------------------|--------------------------------------------------------------------------------------------------------------------------------|
|                                                                                      | ribulose-1,5-bisphosphate carboxylase/oxygenase large subunit ( <i>rbcL</i> ) gene, partial CDS, Chloroplast | maturase K ( <i>matk</i> ) gene, partial cds; chloroplast | photosystem II protein D1 ( <i>psbA</i> ) gene, partial cds; <i>psbA-trnH</i> intergenic spacer, partial sequence; chloroplast |
| <i>C. capparum-coronata</i> 001<br>[Specimen_voucher=KG G.BS-2018-8-CC-M-1]          | MW408292                                                                                                     | MW408284                                                  | MW408322                                                                                                                       |
| <i>C. capparum-coronata</i> 002<br>[Specimen_voucher=KG G.BS-2018-8-CC-M-2]          | MW408294                                                                                                     | MW408285                                                  | MW408323                                                                                                                       |
| <i>C. capparum-coronata</i> 003<br>[Specimen_voucher=RAA.K.BS-2018-9-CC-D-1]         | MW408295                                                                                                     | MW408286                                                  | MW408324                                                                                                                       |
| <i>C. citriodorum</i> 001<br>[Specimen_voucher=KG G.BS-2018-8-C-M-1]                 | MW408289                                                                                                     | MW408281                                                  | MW408301                                                                                                                       |
| <i>C. citriodorum</i> 002<br>[Specimen_voucher=BS-2019-5-C-N-1]                      | MW408290                                                                                                     | MW408282                                                  | MW408302                                                                                                                       |
| <i>C. citriodorum</i> 003<br>[Specimen_voucher=BS-2019-5-C-N-2]                      | MW408291                                                                                                     | MW408283                                                  | MW408303                                                                                                                       |
| <i>C. dubium</i> 001<br>[Specimen_voucher=RH G.BS-2018-11-D-S-1]                     | MW386969                                                                                                     | MW408278                                                  | MW408304                                                                                                                       |
| <i>C. dubium</i> 002<br>[Specimen_voucher=KG G.BS-2018-8-D-M-1]                      | MW408287                                                                                                     | MW408279                                                  | MW408305                                                                                                                       |
| <i>C. dubium</i> 003<br>[Specimen_voucher=RH G.BS-2018-11-D-S-2]                     | MW408288                                                                                                     | MW408280                                                  | MW408306                                                                                                                       |
| <i>C. litseifolium</i> 001<br>[Specimen_voucher=DSA.PCG.BS-2018-5-L-H-1]             | MW386966                                                                                                     | MW408275                                                  | MW408307                                                                                                                       |
| <i>C. litseifolium</i> 002<br>[Specimen_voucher=KG G.BS-2018-8-L-M-1]<br>Chloroplast | MW386967                                                                                                     | MW408276                                                  | MW408308                                                                                                                       |

|                                                                              |          |          |          |
|------------------------------------------------------------------------------|----------|----------|----------|
| <i>C. litseifolium</i> 003<br>[Specimen_voucher=RA<br>AK.BS-2018-9-L-D-1]    | MW386968 | MW408277 | MW408309 |
| <i>C. ovalifolium</i> 001<br>[Specimen_voucher=DS<br>A.PCG.BS-2018-5-O-H-1]  | MW386963 | MW408272 | MW408310 |
| <i>C. ovalifolium</i> 002<br>[Specimen_voucher=DS<br>A.PCG.BS-2018-5-O-HP-1] | MW386964 | MW408273 | MW408311 |
| <i>C. ovalifolium</i> 003<br>[Specimen_voucher=D<br>SA.PCG.BS-2018-5-O-HP-2] | MW386965 | MW408274 | MW408312 |
| <i>C. rivulorum</i> 001<br>[Specimen_voucher=K<br>GG.BS-2018-8-R-M-1]        | MW386960 | MW408269 | MW408313 |
| <i>C. rivulorum</i> 002<br>[Specimen_voucher=K<br>GG.BS-2018-8-R-M-2]        | MW386961 | MW408270 | MW408314 |
| <i>C. rivulorum</i> 003<br>[Specimen_voucher=KG<br>G.BS-2018-8-R-M-3]        | MW386962 | MW408271 | MW408315 |
| <i>C. sinharajaense</i> 001<br>[Specimen_voucher=RH<br>G.BS-2018-11-S-S-1]   | MW386957 | MW408266 | MW408316 |
| <i>C. sinharajaense</i> 002<br>[Specimen_voucher=K<br>GG.BS-2018-8-S-M-1]    | MW386958 | MW408267 | MW408317 |
| <i>C. sinharajaense</i> 003<br>[Specimen_voucher=KG<br>G.BS-2018-8-S-M-4]    | MW386959 | MW408268 | MW408318 |
| <i>C. verum</i> 001<br>[Specimen_voucher=NL<br>BS.CHWMRB-2018-6-V-N-1]       | MW386954 | MW408263 | MW408319 |
| <i>C. verum</i> 002<br>[Specimen_voucher=KG<br>G.BS-2018-8-V-M-1]            | MW386955 | MW408264 | MW408320 |
| <i>C. verum</i> 003<br>[Specimen_voucher=KG<br>G.BS-2018-8-V-M-2]            | MW386956 | MW408265 | MW408321 |
