# Supplementary material for: Universal barcoding regions, rbcL, matK and trnH-psbA do not discriminate Cinnamomum species in Sri Lanka
Source: PubMed Central journal article supplement (PMC7875411; doi:10.1371/journal.pone.0245592), 2021-02-10
Supplement: pone.0245592.s003.pdf [file pone.0245592.s003.pdf]

|                            | 1 | 10 | 120 | 130 |   |   |   |   |   |   |   |   |   |   |   |   |   |   |   |   |   |   |
|----------------------------|---|----|-----|-----|---|---|---|---|---|---|---|---|---|---|---|---|---|---|---|---|---|---|
| 1. C. cappau-coronde 001   | L | P  | H   | P   | H | L | E | K | T | L | W | L | F | K | D | P | F | M | H | Y | V | R |
| 2. C. capparum-coronde 002 | L | P  | H   | P   | H | L | E | K | T | L | W | L | F | K | D | P | F | M | H | Y | V | R |
| 3. C. capparum-coronde 003 | L | P  | H   | P   | H | L | E | K | T | L | W | L | F | K | D | P | F | M | H | Y | V | R |
| 4. C. citriodorum 001      | L | P  | H   | P   | H | L | E | K | T | L | W | L | F | K | D | P | F | M | H | Y | V | R |
| 5. C. citriodorum 002      | L | P  | H   | P   | H | L | E | K | T | L | W | L | F | K | D | P | F | M | H | Y | V | R |
| 6. C. citriodorum 003      | L | P  | H   | P   | H | L | E | K | T | L | W | L | F | K | D | P | F | M | H | Y | V | R |
| 7. C. dubium 001           | L | P  | H   | P   | H | L | E | K | T | L | W | L | F | K | D | P | F | M | H | Y | V | R |
| 8. C. dubium 002           | L | P  | H   | P   | H | L | E | K | T | L | W | L | F | K | D | P | F | M | H | Y | V | R |
| 9. C. dubium 003           | L | P  | H   | P   | H | L | E | K | T | L | W | L | F | K | D | P | F | M | H | Y | V | R |
| 10. C. litseifolium 001    | L | P  | H   | P   | H | L | E | K | T | L | W | L | F | K | D | P | F | M | H | Y | V | R |
| 11. C. litseifolium 002    | L | P  | H   | P   | H | L | E | K | T | L | W | L | F | K | D | P | F | M | H | Y | V | R |
| 12. C. litseifolium 003    | L | P  | H   | P   | H | L | E | K | T | L | W | L | F | K | D | P | F | M | H | Y | V | R |
| 13. C. ovalifolium 001     | L | P  | H   | P   | H | L | E | K | T | L | W | L | F | K | D | P | F | M | H | Y | V | R |
| 14. C. ovalifolium 002     | L | P  | H   | P   | H | L | E | K | T | L | W | L | F | K | D | P | F | M | H | Y | V | R |
| 15. C. ovalifolium 003     | L | P  | H   | P   | H | L | E | K | T | L | W | L | F | K | D | P | F | M | H | Y | V | R |
| 16. C. rivulorum 001       | L | P  | H   | P   | H | L | E | K | T | L | W | L | F | K | D | P | F | M | H | Y | V | R |
| 17. C. rivulorum 002       | L | P  | H   | P   | H | L | E | K | T | L | W | L | F | K | D | P | F | M | H | Y | V | R |
| 18. C. rivulorum 003       | L | P  | H   | P   | H | L | E | K | T | L | W | L | F | K | D | P | F | M | H | Y | V | R |
| 19. C. sinharajaense 001   | L | P  | H   | P   | H | L | E | K | T | L | W | L | F | K | D | P | F | M | H | Y | V | R |
| 20. C. sinharajaense 002   | L | P  | H   | P   | H | L | E | K | T | L | W | L | F | K | D | P | F | M | H | Y | V | R |
| 21. C. sinharajaense 003   | L | P  | H   | P   | H | L | E | K | T | L | W | L | F | K | D | P | F | M | H | Y | V | R |
| 22. C. ver 001             | L | P  | H   | P   | H | L | E | K | T | L | W | L | F | K | D | P | F | M | H | Y | V | R |
| 23. C. ver 002             | L | P  | H   | P   | H | L | E | K | T | L | W | L | F | K | D | P | F | M | H | Y | V | R |
| 24. C. ver 003             | L | P  | H   | P   | H | L | E | K | T | L | W | L | F | K | D | P | F | M | H | Y | V | R |
| 25. C. ver (NCBI)          | L | P  | H   | P   | H | L | E | K | T | L | W | L | F | K | D | P | F | M | H | Y | V | R |
